# Supplementary material for: The fluorescence turn-off mechanism of a norbornene-derived homopolymer – an Al3+ colorimetric and fluorescent chemosensor
Source: Royal Society of Chemistry journal article supplement (doi:10.1039/d1ma00254f), 2021-01-01
Supplement: d1ma00254f1.pdf [file d1ma00254f1.pdf]

## Supporting Information

### Fluorescence Turn-off Mechanism of Norbornene Derived Homopolymer – An Al<sup>3+</sup> Colorimetric and Fluorescent Chemosensor

*Trong-Nghia Le, †, Kuan-Yu Lin, † Anusha Valaboju, Cheng-Kang Lee, Jyh-Chiang Jiang\* and N. Vijayakameswara Rao\**

Department of Chemical Engineering, National Taiwan University of Science and Technology, Taipei, Taiwan.

† These authors contributed equally to this work.

\*Corresponding author:

**Jyh-Chiang Jiang**, e-mail: jcjiang@mail.ntust.edu.tw

**Vijayakameswara Rao**, e-mail: vijayrao@mail.ntust.edu.tw

#### List of Figures

|                                                                                                                                                                                          |    |
|------------------------------------------------------------------------------------------------------------------------------------------------------------------------------------------|----|
| <b>Figure S1.</b> <sup>1</sup> H NMR spectra of NDMIP in CDCl <sub>3</sub> .....                                                                                                         | 2  |
| <b>Figure S2.</b> FTIR spectra of NDMIP and NDMIP-DASA .....                                                                                                                             | 3  |
| <b>Figure S3.</b> <sup>1</sup> H NMR spectra of PNDMIP in DMSO- <i>d</i> <sub>6</sub> .....                                                                                              | 4  |
| <b>Figure S4.</b> FTIR spectra of PNDMIP .....                                                                                                                                           | 5  |
| <b>Figure S5.</b> <sup>1</sup> H NMR of NDMIP-DASA in CDCl <sub>3</sub> .....                                                                                                            | 6  |
| <b>Figure S6.</b> FTIR spectra of PNDMIP-DASA 24k, 39k and 56k.....                                                                                                                      | 7  |
| <b>Figure S7.</b> Change in fluorescence spectra of NDMIP-DASA (a), PNDMIP-DASA 24k (b), 39k (c), 56k (d) in THF:DIW (2:8) (6.5 ppm) upon gradual addition of Al <sup>3+</sup> ion. .... | 10 |
| <b>Figure S8.</b> Job's plot for stoichiometry of NDMIP-DASA (a) and PNDMIP-DASA (b) with Al <sup>3+</sup> by UV/Vis spectroscopy. ....                                                  | 14 |
| <b>Figure S9.</b> The pH effect on absorption (λ = 511 nm) of NDMIP-DASA (a) and PNDMIP-DASA (b) in the presence of Al <sup>3+</sup> (10 μM). ....                                       | 15 |

#### List of Tables

|                                                                                                                                                                                                                             |    |
|-----------------------------------------------------------------------------------------------------------------------------------------------------------------------------------------------------------------------------|----|
| <b>Table S1.</b> The benchmark calculations of adsorption maximum for the sensor <b>M</b> , which considered different DFT functionals such as B3LYP, CAM-B3LYP, M062X, ωB97XD, and PBE0 with and without THF solvent. .... | 8  |
| <b>Table S2.</b> Table comprising molecular weight and PDI of PNDMIP-DASA by GPC. 9                                                                                                                                         |    |
| <b>Table S3.</b> Limit of detection (LOD) of NDMIP-DASA and PNDMIP-DASA by UV/Vis and fluorescence spectroscopy .....                                                                                                       | 11 |
| <b>Table S4.</b> The dominant structure parameters of sensor <b>M</b> and the complex <b>M-Al<sup>3+</sup></b> in the ground state and excited state (*). ....                                                              | 12 |
| <b>Table S5.</b> The dominant structure parameters of sensor <b>D</b> and the complex <b>D-Al<sup>3+</sup></b> in the ground state and excited state (*). ....                                                              | 13 |
| <b>Table S6.</b> Comparison of NDMIP-DASA and PNDMIP-DASA with previous reports on Al <sup>3+</sup> sensors in literature.....                                                                                              | 16 |

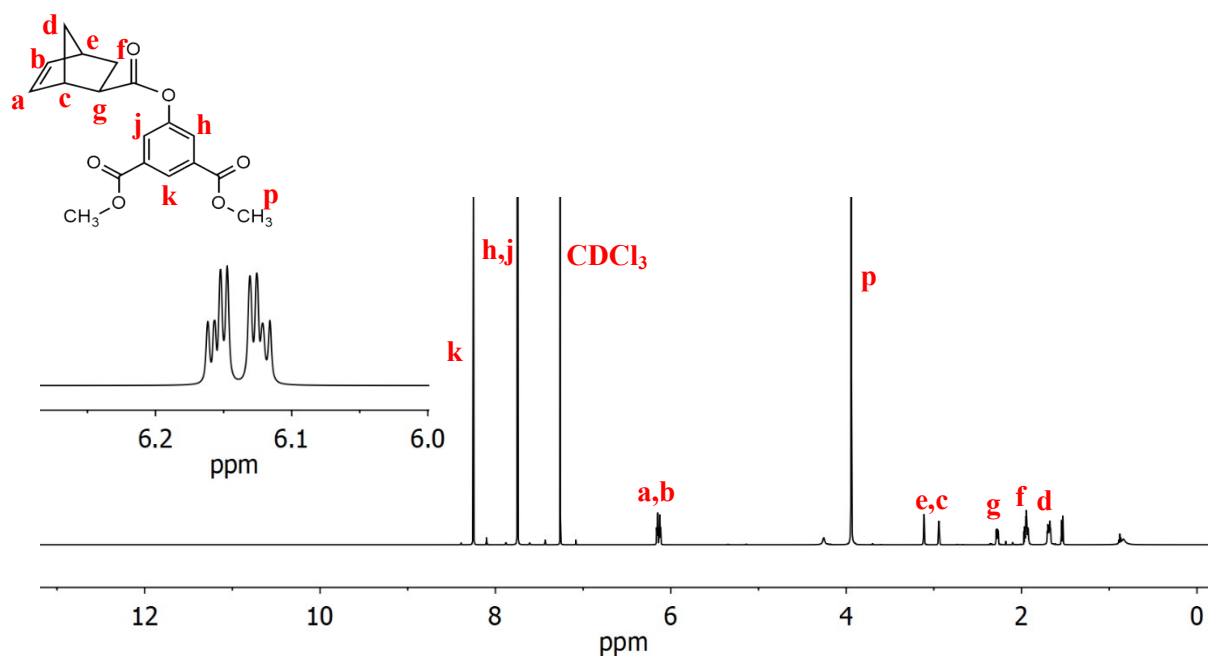

**Figure S1.** <sup>1</sup>H NMR spectra of NDMIP in CDCl<sub>3</sub>

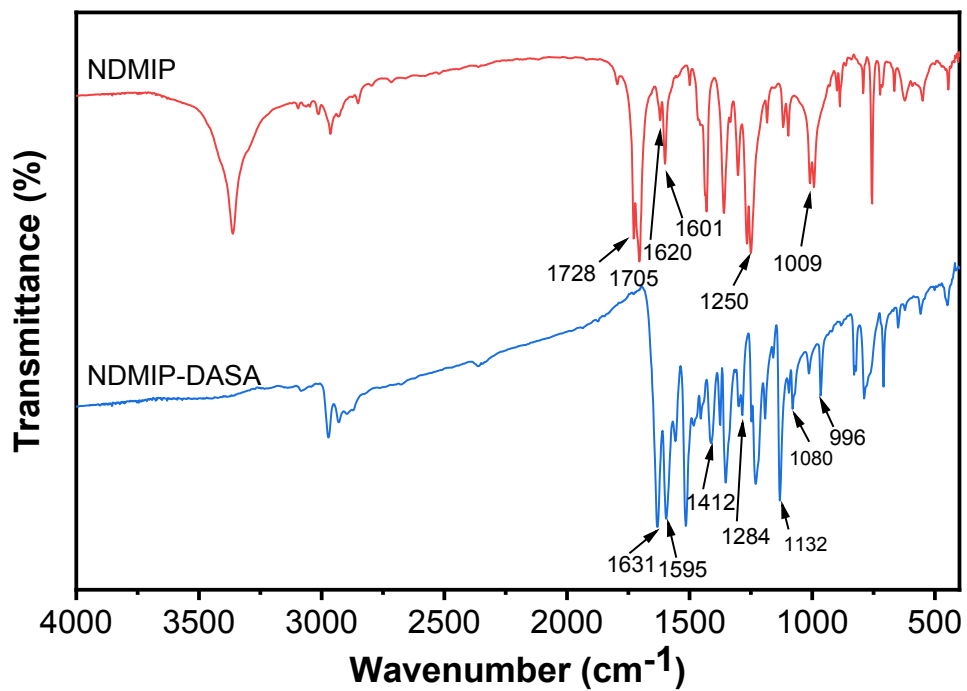

**Figure S2.** FTIR spectra of NDMIP and NDMIP-DASA

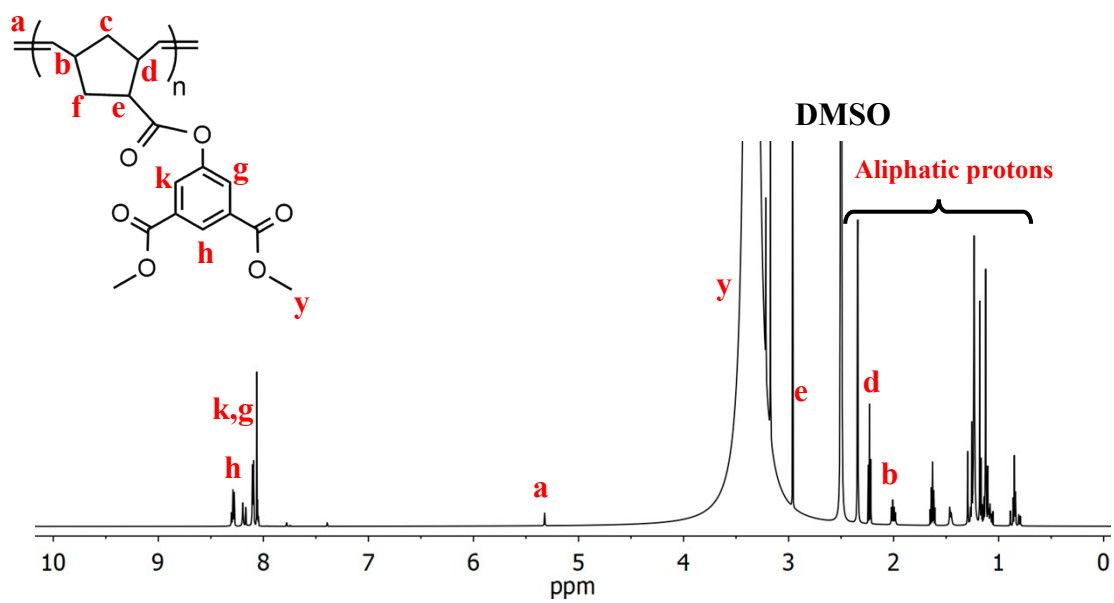

Figure S3. <sup>1</sup>H NMR spectra of PNDMIP in DMSO-*d*<sub>6</sub>

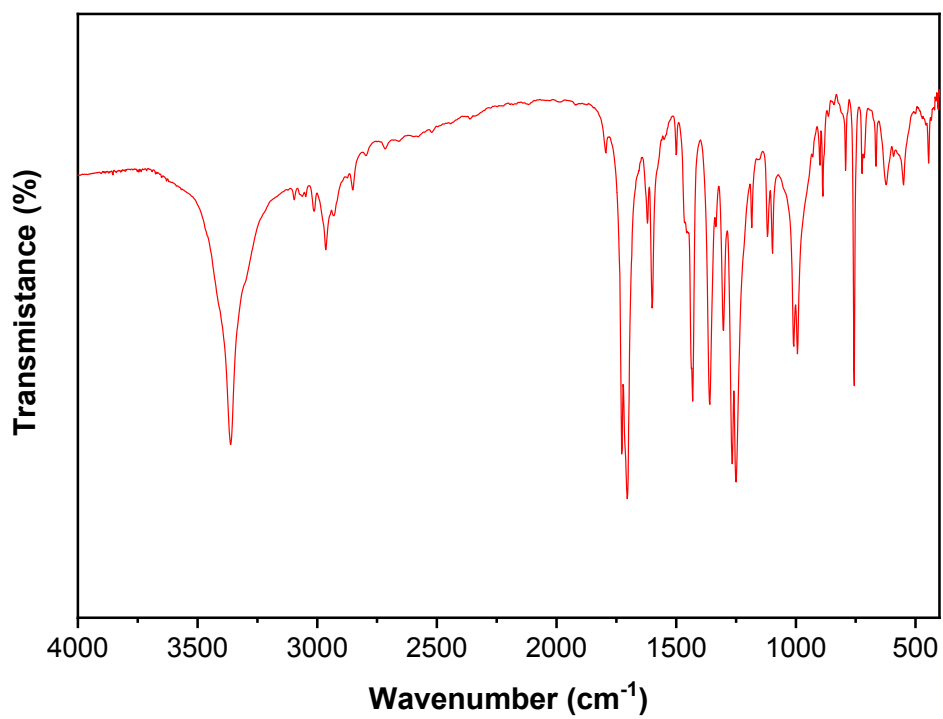

**Figure S4.** FTIR spectra of PNDMIP

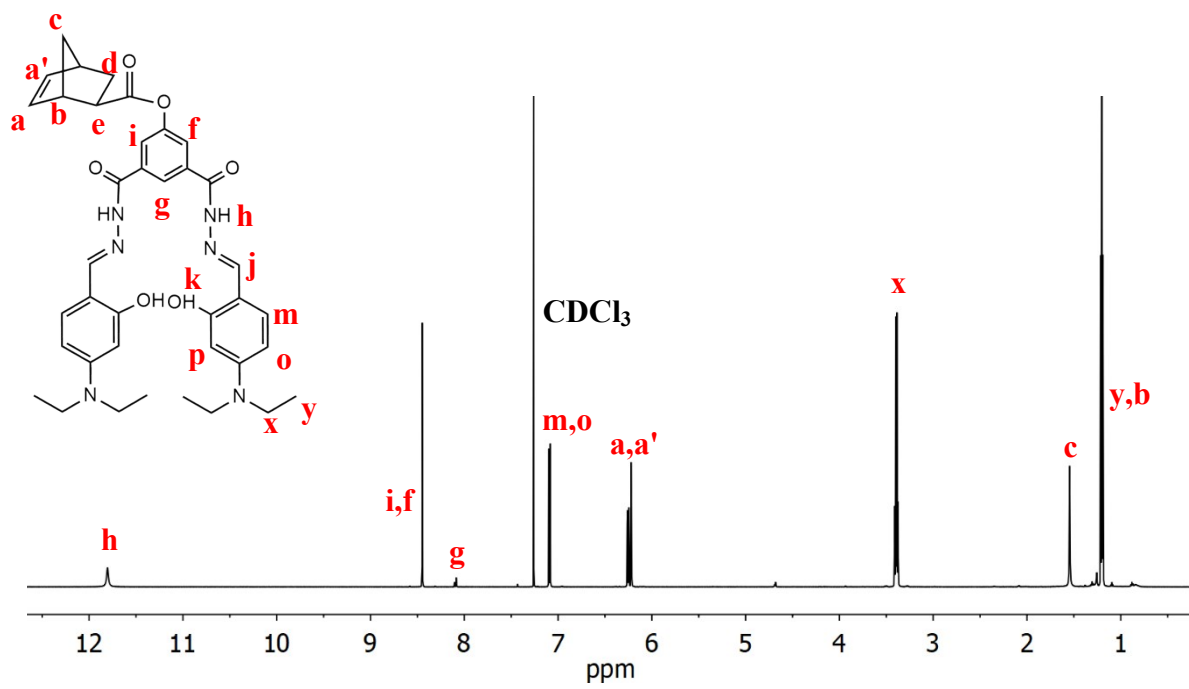

Figure S5. <sup>1</sup>H NMR of NDMIP-DASA in CDCl<sub>3</sub>

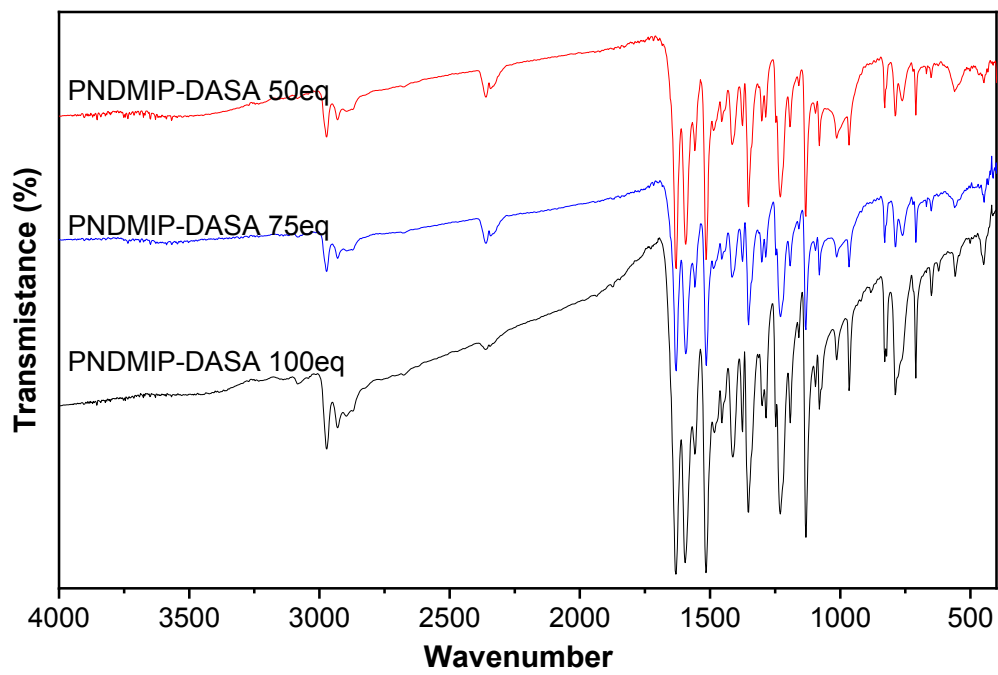

**Figure S6.** FTIR spectra of PNDMIP-DASA 24k, 39k and 56k.

**Table S1.** The benchmark calculations of adsorption maximum for the sensor **M**, which considered different DFT functionals such as B3LYP, CAM-B3LYP, M062X,  $\omega$ B97XD, and PBE0 with and without THF solvent.

| Basis Set | CAM-B3LYP | CAM-B3LYP<br>(Solv.) | wB97   | wB97<br>(Solv.) | B3LYP | B3LYP<br>(Solv.) | M062X | M062X<br>(Solv.) | Exp.<br>Value |
|-----------|-----------|----------------------|--------|-----------------|-------|------------------|-------|------------------|---------------|
| 6-31G(d)  | 319.43    | 326.52               | 294.74 | 300.98          | 403.3 | 408.21           | 321.9 | 329.12           | 422           |



**Table S2.** Table comprising molecular weight and PDI of PNDMIP-DASA by GPC.

| <b>Homopolymer</b> | <b>MW<br/>(Da)</b> | <b>Polydispersity</b> |
|--------------------|--------------------|-----------------------|
| PNDMIP-DASA 24k    | 24039              | 1.04                  |
| PNDMIP-DASA 39k    | 38964              | 1.02                  |
| PNDMIP-DASA 56k    | 56549              | 1.13                  |

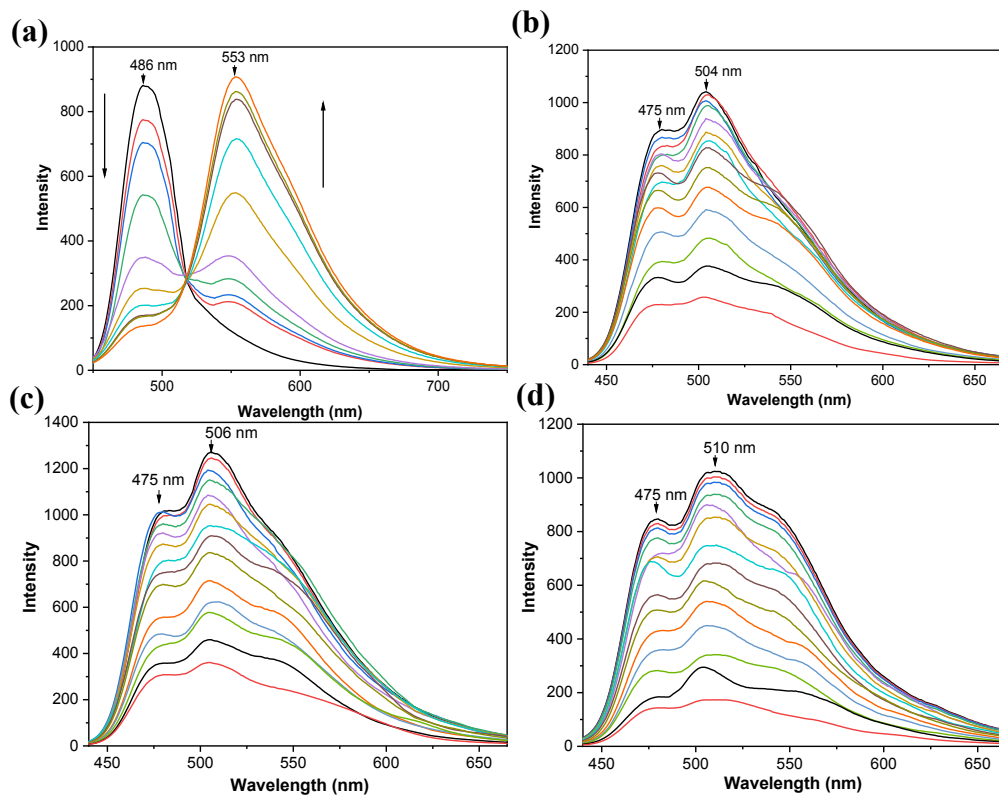

**Figure S7.** Change in fluorescence spectra of NDMIP-DASA (a), PNDMIP-DASA 24k (b), 39k (c), 56k (d) in THF:DIW (2:8) (6.5 ppm) upon gradual addition of  $\text{Al}^{3+}$  ion.

**Limit of detection (LOD)**

Based on the colorimetric and fluorescence titration, the detection limit (LOD) was calculated using the following equation:

$$LOD = \frac{3\sigma}{k}$$

Where  $\sigma$  represents the standard deviation of blank samples, and  $k$  represents the slope between the absorption intensity ratio ( $A_{511 \text{ nm}}/A_{422 \text{ nm}}$ ) or emission intensity versus the  $Al^{3+}$  concentration. (*J. Mater. Chem. B*, **2020**; 8(16):3557-3565; *Sens. Actuators B Chem.* **2015**; 208:75-84)

**Table S3.** Limit of detection (LOD) of NDMIP-DASA and PNDMIP-DASA by UV/Vis and fluorescence spectroscopy

| <b>Sensors</b>  | <b>LOD by UV/Vis spectroscopy (nM)</b> | <b>LOD by fluorescence spectroscopy (nM)</b> |
|-----------------|----------------------------------------|----------------------------------------------|
| NDMIP-DASA      | 70.82                                  | 27.60                                        |
| PNDMIP-DASA 24k | 56.89                                  | 16.13                                        |
| PNDMIP-DASA 39k | 15.69                                  | 7.44                                         |
| PNDMIP-DASA 56k | 47.74                                  | 2.94                                         |

**Table S4.** The dominant structure parameters of sensor **M** and the complex **M-Al<sup>3+</sup>** in the ground state and excited state (\*)

|                     | Coordination Number | Dihedral angle (°) |                | Bond length (Å)    |                    |                    |                   |
|---------------------|---------------------|--------------------|----------------|--------------------|--------------------|--------------------|-------------------|
|                     |                     | D <sub>1</sub>     | D <sub>2</sub> | d <sub>Al-O1</sub> | d <sub>Al-O2</sub> | d <sub>Al-O3</sub> | d <sub>Al-N</sub> |
| M                   | -                   | 29.33              | 29.21          |                    |                    |                    |                   |
| M*                  | -                   | 24.71              | 11.71          |                    |                    |                    |                   |
| M-Al <sup>3+</sup>  | 4                   | 0.40               | 0.05           | 1.82               | 1.77               | 1.72               | 1.91              |
| M-Al <sup>3+*</sup> | 4                   | 1.90               | 0.16           | 1.81               | 1.77               | 1.72               | 1.92              |

**Table S5.** The dominant structure parameters of sensor **D** and the complex **D-Al<sup>3+</sup>** in the ground state and excited state (\*)

|                     | Coordination Number | Dihedral angle (°) |                |                |                | Bond length (Å)          |                          |                          |                          |                          |                           |
|---------------------|---------------------|--------------------|----------------|----------------|----------------|--------------------------|--------------------------|--------------------------|--------------------------|--------------------------|---------------------------|
|                     |                     | D <sub>1</sub>     | D <sub>2</sub> | D <sub>3</sub> | D <sub>4</sub> | <i>d<sub>Al-O1</sub></i> | <i>d<sub>Al-O2</sub></i> | <i>d<sub>Al-O3</sub></i> | <i>d<sub>Al-O4</sub></i> | <i>d<sub>Al-N5</sub></i> | <i>d<sub>Al-N18</sub></i> |
| D                   | -                   | 129.77             | 46.84          | -32.2          | -151.50        |                          |                          |                          |                          |                          |                           |
| D*                  | -                   | 130.31             | 43.00          | -24.67         | -167.71        |                          |                          |                          |                          |                          |                           |
| D-Al <sup>3+</sup>  | 6                   | -6.99              | 150.43         | -151.15        | 153.37         | 1.85                     | 1.91                     | 1.85                     | 2.06                     | 1.98                     | 2.03                      |
| D-Al <sup>3+*</sup> | 6                   | -8.7               | 151.16         | -171.1         | 153.42         | 1.91                     | 1.84                     | 1.97                     | 1.87                     | 1.99                     | 2.04                      |

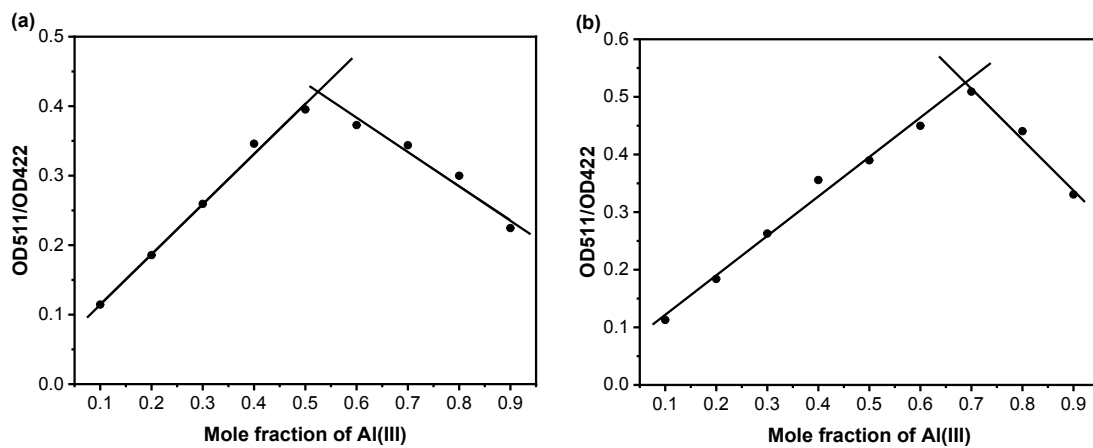

**Figure S8.** Job's plot for stoichiometry of NDMIP-DASA (a) and PNDMIP-DASA (b) with  $\text{Al}^{3+}$  by UV/Vis spectroscopy.

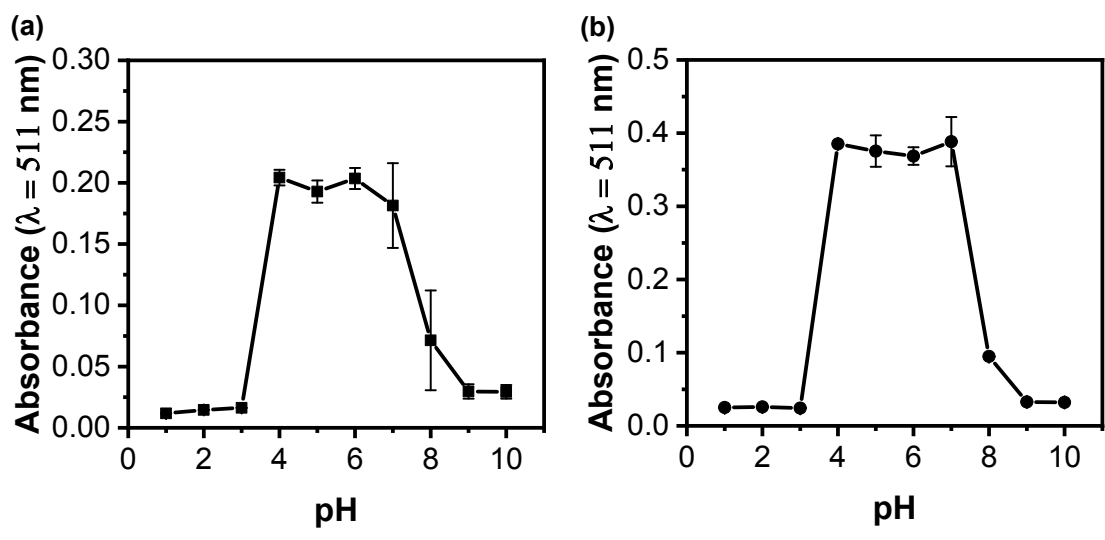

**Figure S9.** The pH effect on absorption ( $\lambda = 511 \text{ nm}$ ) of NDMIP-DASA (a) and PNDMIP-DASA (b) in the presence of  $\text{Al}^{3+}$  ( $10 \mu\text{M}$ ).

**Table S6.** Comparison of NDMIP-DASA and PNDMIP-DASA with previous reports on Al<sup>3+</sup> sensors in literature.

| Type                  | Probes            | Solvent system          | Limit of detection (M)                                                     | References                                              |
|-----------------------|-------------------|-------------------------|----------------------------------------------------------------------------|---------------------------------------------------------|
| Polymer probes        | PNDMIP-DASA       | THF/ Water (2:8, v/v)   | $2.94 \times 10^{-9}$                                                      | This work                                               |
|                       | PEGSB             | Water                   | $1.32 \times 10^{-8}$                                                      | <i>Tetrahedron</i> , <b>2021</b> , 79, 131888.          |
|                       | mPEG-Dye-Biotin   | Water                   | $2.02 \times 10^{-8}$                                                      | <i>J. Mater. Chem. B</i> , <b>2020</b> , 8, 3557-3565   |
|                       | PEGBAB            | Water                   | $4.05 \times 10^{-9}$                                                      | <i>Polymers</i> , <b>2019</b> , 11, 573                 |
|                       | Zn(DMA)(TBA)      | Water                   | $1.97 \times 10^{-6}$                                                      | <i>Inorg. Chem. Front.</i> , <b>2017</b> , 4, 1888-1894 |
| Small molecule probes | NDMIP-DASA        | THF/ Water (2:8, v/v)   | $2.76 \times 10^{-8}$                                                      | This work                                               |
|                       | ZXQ               | MeCN/Water (95:5, v/v)  | -                                                                          | <i>Inorg. Chem. Commun.</i> , <b>2020</b> , 108168      |
|                       | NDHIPH            | HEPES/DMSO              | $2.53 \times 10^{-9}$                                                      | <i>ACS Omega</i> <b>2019</b> , 4, 18520-18529           |
|                       | BPD               | Britton-Robinson buffer | $2.65 \times 10^{-8}$                                                      | <i>Sens. Actuators B Chem.</i> <b>2019</b> , 294, 14-23 |
|                       | A, B and C        | ACN/ Water              | $1.03 \times 10^{-7}$ ,<br>$3.17 \times 10^{-7}$ ,<br>$9.1 \times 10^{-8}$ | <i>Mater. Chem. Phys.</i> , <b>2019</b> , 233, 89-101   |
|                       | DFSB              | EtOH/ Water             | $3.7 \times 10^{-8}$                                                       | <i>RSC Adv.</i> , <b>2018</b> , 8, 31889-31894          |
|                       | H <sub>2</sub> VM | HEPES                   | $11.34 \times 10^{-9}$                                                     | <i>Dalton Trans.</i> , <b>2018</b> , 47, 15907-15916    |
